# Supplementary material
Source: MDPI journal article supplement (https://www.mdpi.com/2673-4532/2/4/13)

# Simultaneous Detection of Drug-Induced Liver Injury Protein and microRNA biomarkers using dynamic chemical labelling on a Luminex MAGPIX system

Antonio Marín-Romero <sup>a, b, c</sup>, Mavys Tabraue-Chávez <sup>a</sup>, Bárbara López-Longarela <sup>a</sup>, Mario A. Fara <sup>a</sup>, Rosario M. Sánchez-Martín <sup>b, c</sup>, James W. Dear <sup>d</sup>, Hugh Ilyine <sup>e</sup>, Juan J. Díaz-Mochón <sup>b, c, \*</sup> and Salvatore Pernagallo <sup>a, \*</sup>

<sup>a.</sup> DESTINA Genomica S.L. Parque Tecnológico Ciencias de la Salud (PTS), Avenida de la Innovación 1, Edificio BIC, Armilla, Granada 18100, Spain.

<sup>b.</sup> GENYO - Centre for Genomics and Oncological Research: Pfizer / University of Granada / Andalusian Regional Government, PTS Granada - Avenida de la Ilustración, 114 - 18016 GRANADA, Spain

<sup>c.</sup> Universidad de Granada. Facultad de Farmacia. Departamento de Química Farmacéutica y Orgánica, Campus Cartuja s/n, 18071 Granada, Spain

<sup>d.</sup> Pharmacology, Therapeutics and Toxicology, Centre for Cardiovascular Science, University of Edinburgh, The Queen's Medical Research Institute, 47 Little France Crescent, Edinburgh, EH16 4TJ, UK.

<sup>e.</sup> DESTINA Genomics Ltd, 7-11 Melville St, Edinburgh EH3 7PE, UK

<sup>†</sup> Corresponding author: [salvatore@destinagenomics.com](mailto:salvatore@destinagenomics.com), [juan@destinagenomics.com](mailto:juan@destinagenomics.com)

## Electronic Supplementary Information (ESI)

**Table S1 – Sequences**

| Sequence ID | Name           | Peptide with abasic position (N'-C') |
|-------------|----------------|--------------------------------------|
| 1           | DGL 122        | xx-CACCATT*GT*_AC*ACT*CCA            |
|             |                | <b>miRNA sequence (5'-3')</b>        |
| 2           | Target miR-122 | <u>UGGAGUGUGACAAUGGUGUUUG</u>        |

xx = amino-PEG-linker; “\*” = propanoic acid side chain at the gamma position; “\_” = abasic unit containing a propanoic acid side chain at the gamma position. The underlined sequence miR-122 is the region that hybridises with the DGL 122. The “G” in position 9 from 5' (in bold) is opposite to the abasic unit monomer and allows the specific incorporation of the aldehyde-modified biotinylated cytosine nucleobase (Figure S1).

**Figure S1 – Chemical structure of aldehyde-modified biotinylated cytosine nucleobase**

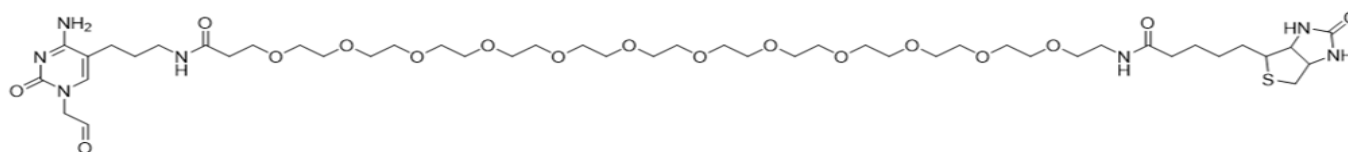

### Section S1 – Reagents for reactions

Assay buffer, Anti-ARG1 Beads and detection antibody were purchased from Merck (Cat # HLINJMAG-75K). The proprietary Stabiltech buffer was purchased from DESTINA Genomica S.L. Wash buffer contains 0.1% Tween 20 in PBS 1X.

### Section S2 – Luminex MagPlex beads coupling with DGL 122

Five million microspheres were suspended in MES Buffer (50 µL, 0.1 M, pH 5) in an eppendorf tube and combined with (i) a solution with 200 pmoles of abasic probe (2 µL, 100 µM), (ii) EDC (2.5 µL, 10 mg/mL in de-ionised water). The solution was then vortexed and incubated for 30 min at room temperature with shaking taking place in darkness. Following this, 2.5 µL of a second EDC solution (10 mg/mL freshly prepared) was added, and the solution incubated for further 30 min at room temperature in darkness. Beads were washed once with 1 mL of 0.02% Tween 20 and once with 1 mL of 0.1% SDS. Following the washings, the beads were then resuspended and incubated with 200 µL of Ethanolamine (50 mM) in 0.1% Tween 20 for 1h, under vortexing at room temperature in darkness. The beads were then washed one more time in 1 mL of 0.02% Tween 20 solution, and 1 mL of 0.1% SDS solution. Finally, the beads were resuspended in 100 µL of PBS solution with 0.1% Tween20 and 10% PEG10K.

**Table S2. ARG1 calibration curve data. n = 3**

| Standard   | Expected concentration (pg/mL) | MFI Average | SD     | CV     |
|------------|--------------------------------|-------------|--------|--------|
| Standard 7 | 50000.00                       | 19518.50    | 799.74 | 4.10%  |
| Standard 6 | 16666.67                       | 12795.50    | 222.03 | 1.74%  |
| Standard 5 | 5555.56                        | 5945.50     | 30.41  | 0.51%  |
| Standard 4 | 1851.85                        | 1674.50     | 21.92  | 1.31%  |
| Standard 3 | 617.28                         | 416.00      | 120.21 | 28.90% |
| Standard 2 | 205.76                         | 218.50      | 17.68  | 8.09%  |
| Standard 1 | 68.59                          | 101.75      | 8.13   | 7.99%  |
| Standard 0 | 0.00                           | 67.50       | 12.02  | 17.81% |

**Table S3. miR-122 calibration curve data. n = 3**

| Standard   | Expected concentration (pM) | MFI Average | SD     | CV    |
|------------|-----------------------------|-------------|--------|-------|
| Standard 7 | 1050.00                     | 3723.17     | 173.35 | 4.66% |
| Standard 6 | 350.00                      | 2009.00     | 63.15  | 3.14% |
| Standard 5 | 116.67                      | 876.67      | 39.26  | 4.48% |
| Standard 4 | 38.89                       | 367.67      | 30.75  | 8.36% |
| Standard 3 | 12.96                       | 189.00      | 7.55   | 3.99% |
| Standard 2 | 4.32                        | 110.33      | 6.43   | 5.83% |
| Standard 1 | 1.44                        | 77.17       | 2.36   | 3.06% |
| Standard 0 | 0.00                        | ----        | ----   | ----  |

**Table S4. MFI measurement (in triplicate) of ARG1 and miR-122 in singleplex analysis and seqCOMBO. Respective concentrations (pg/mL for ARG1 and pM for miR-122) are calculated through the calibration curves reported in Figure 2. n = 3**

| Assay                     | Sample  | Analyte | Average MFI | SD    | CV    | Predicted concentration (pg/mL or pM) |
|---------------------------|---------|---------|-------------|-------|-------|---------------------------------------|
| <b>ARG1 singleplex</b>    | DILI    | ARG1    | 3340.5      | 118.9 | 3.54% | 3451.4                                |
|                           | No DILI |         | 31.0        | 0.0   | 0.00% | n.d.                                  |
| <b>miR-122 singleplex</b> | DILI    | miR-122 | 1376.8      | 89.5  | 6.50% | 207.0                                 |
|                           | No DILI |         | 26.0        | 0.0   | 0.00% | n.d.                                  |
| <b>seqCOMBO</b>           | DILI    | ARG1    | 3256.0      | 166.9 | 5.13% | 3372.9                                |
|                           |         | miR-122 | 1436.5      | 153.4 | 10.7% | 219.3                                 |
|                           | No DILI | ARG1    | 52.5        | 0.7   | 1.35% | n.d.                                  |
|                           |         | miR-122 | 42.5        | 2.12  | 4.99% | n.d.                                  |

**Figure S2 – Levels of ARG1 and miR-122 in DILI patient when measured via singleplex and seqCOMBO assays. Inter-CV values between singleplex and seqCOMBO are represented. n = 3.**

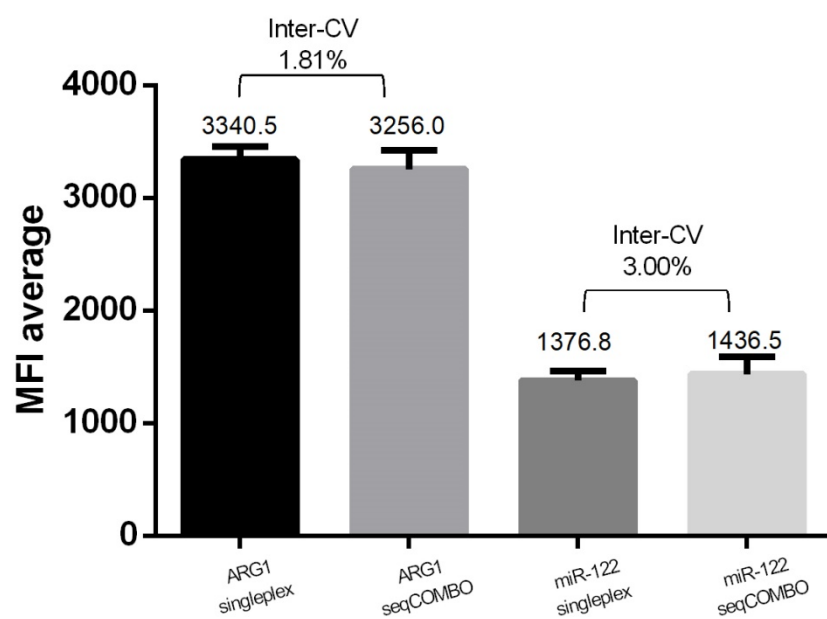

Supplement: s1 [file s1]
